# Supplementary material for: In Vitro Murine Hematopoiesis Supported by Signaling from a Splenic Stromal Cell Line
Source: Stem Cells Int. 2018 Dec 25;2018:9896142. doi: 10.1155/2018/9896142 (PMC6323497; doi:10.1155/2018/9896142)
Supplement: Supplementary Materials — Supplementary Figure 1: stromal cells do not express hematopoietic cell markers. Supplementary Figure 2: the specific effect of Notch inhibition on hematopoiesis in vitro. [file 9896142.f1.zip]

Archive with 7 entries (4 files):
- Supp files/
- Supp files/S1 Fig rev.tif
- __MACOSX/
- __MACOSX/Supp files/
- __MACOSX/Supp files/._S1 Fig rev.tif
- Supp files/S2_Fig rev.tif
- __MACOSX/Supp files/._S2_Fig rev.tif
